# Supplementary material for: Serum levels of environmental pollutants is a risk factor for breast cancer in Inuit: a case control study
Source: PubMed Central journal article supplement (PMC5470290; doi:10.1186/s12940-017-0269-6), 2017-06-13
Supplement: 12940_2017_269_MOESM1_ESM.pdf [file 12940_2017_269_MOESM1_ESM.pdf]

# Additional file 1

## Serum levels of environmental pollutants is a risk factor for breast cancer in Inuit: A case control study

Maria Wielsøe, Peder Kern and Eva C. Bonefeld-Jørgensen

Limit of detection (LOD) of the measure compounds and the detection frequencies in the total samples set and the two collection periods separately

| Compound         | Total       | 2000-2003 |             | 2011-2014  |             |
|------------------|-------------|-----------|-------------|------------|-------------|
|                  | % Above LOD | LOD       | % Above LOD | LOD        | % Above LOD |
| PFBS*            | 0.0         |           |             | 0.02 ng/ml | 0.0         |
| PFHxS            | 98.8        | 0.4 ng/ml | 96.8        | 0.03 ng/ml | 100.0       |
| PFHpS*           | 95.0        |           |             | 0.04 ng/ml | 95.0        |
| PFOS             | 100.0       | 0.1 ng/ml | 100.0       | 0.09 ng/ml | 100.0       |
| PFDS*            | 2.0         |           |             | 0.12 ng/ml | 2.0         |
| PFOSA            | 27.3        | 0.2 ng/ml | 69.4        | 0.40 ng/ml | 1.0         |
| PFPeA*           | 0.0         |           |             | 0.06 ng/ml | 0.0         |
| PFHxA*           | 0.0         |           |             | 0.01 ng/ml | 0.0         |
| PFHpA            | 72.1        | 0.1 ng/ml | 51.6        | 0.02 ng/ml | 84.9        |
| PFOA             | 96.9        | 0.4 ng/ml | 91.9        | 0.07 ng/ml | 100.0       |
| PFNA             | 96.3        | 0.5 ng/ml | 90.3        | 0.09 ng/ml | 100.0       |
| PFDA             | 99.4        | 0.1 ng/ml | 98.4        | 0.03 ng/ml | 100.0       |
| PFUnA            | 98.1        | 0.2 ng/ml | 95.2        | 0.05 ng/ml | 100.0       |
| PFDoA            | 57.1        | 0.3 ng/ml | 54.8        | 0.14 ng/ml | 58.6        |
| PFTTrA           | 35.4        | 0.3 ng/ml | 69.4        | 0.14 ng/ml | 14.1        |
| PFTTeA*          | 0.0         |           |             | 0.14 ng/ml | 0.0         |
| Aldrin*          | 0.0         |           |             | 0.01 µg/L  | 0.0         |
| Cis-Nonachlor    | 99.3        | 0.04 µg/L | 100.0       | 0.005 µg/L | 99.0        |
| Trans-Nonachlor  | 99.3        | 0.04 µg/L | 100.0       | 0.01 µg/L  | 99.0        |
| HCB              | 100.0       | 0.04 µg/L | 100.0       | 0.04 µg/L  | 100.0       |
| Mirex            | 94.7        | 0.04 µg/L | 100.0       | 0.01 µg/L  | 91.9        |
| Oxychlordane     | 100.0       | 0.04 µg/L | 100.0       | 0.005 µg/L | 100.0       |
| alpha-Chlordane* | 2.0         |           |             | 0.01 µg/L  | 2.0         |
| gamma-Chlordane* | 0.0         |           |             | 0.005 µg/L | 0.0         |
| p,p'-DDE         | 100.0       | 0.08 µg/L | 100.0       | 0.09 µg/L  | 100.0       |
| p,p'-DDT         | 69.3        | 0.08 µg/L | 90.6        | 0.05 µg/L  | 58.2        |
| β-HCH            | 99.3        | 0.08 µg/L | 100.0       | 0.01 µg/L  | 99.0        |
| PBB153*          | 17.2        |           |             | 0.03 µg/L  | 17.2        |
| PBDE15*          | 0.0         |           |             | 0.03 µg/L  | 0.0         |
| PBDE17*          | 0.0         |           |             | 0.03 µg/L  | 0.0         |
| PBDE25*          | 0.0         |           |             | 0.03 µg/L  | 0.0         |
| PBDE28*          | 0.0         |           |             | 0.03 µg/L  | 0.0         |
| PBDE33*          | 3.0         |           |             | 0.03 µg/L  | 3.0         |

|                 |              |           |       |           |       |
|-----------------|--------------|-----------|-------|-----------|-------|
| <b>PBDE47*</b>  | <b>7.1</b>   |           |       | 0.03 µg/L | 7.1   |
| <b>PBDE99*</b>  | <b>0.0</b>   |           |       | 0.02 µg/L | 0.0   |
| <b>PBDE100*</b> | <b>1.0</b>   |           |       | 0.02 µg/L | 1.0   |
| <b>PBDE153*</b> | <b>8.1</b>   |           |       | 0.03 µg/L | 8.1   |
| <b>PCB28*</b>   | <b>9.3</b>   |           |       | 0.05 µg/L | 9.3   |
| <b>PCB52*</b>   | <b>0.0</b>   |           |       | 0.3 µg/L  | 0.0   |
| <b>PCB99</b>    | <b>96.9</b>  | 0.04 µg/L | 100.0 | 0.03 µg/L | 95.0  |
| <b>PCB101</b>   | <b>53.6</b>  | 0.04 µg/L | 75.5  | 0.03 µg/L | 42.4  |
| <b>PCB105</b>   | <b>92.1</b>  | 0.04 µg/L | 98.1  | 0.01 µg/L | 88.9  |
| <b>PCB128*</b>  | <b>49.4</b>  |           |       | 0.01 µg/L | 49.4  |
| <b>PCB138</b>   | <b>100.0</b> | 0.04 µg/L | 100.0 | 0.01 µg/L | 100.0 |
| <b>PCB153</b>   | <b>100.0</b> | 0.04 µg/L | 100.0 | 0.01 µg/L | 100.0 |
| <b>PCB156</b>   | <b>98.0</b>  | 0.04 µg/L | 100.0 | 0.01 µg/L | 97.0  |
| <b>PCB170</b>   | <b>100.0</b> | 0.04 µg/L | 100.0 | 0.01 µg/L | 100.0 |
| <b>PCB180</b>   | <b>100.0</b> | 0.04 µg/L | 100.0 | 0.01 µg/L | 100.0 |
| <b>PCB183</b>   | <b>98.0</b>  | 0.04 µg/L | 100.0 | 0.01 µg/L | 97.0  |
| <b>PCB187</b>   | <b>100.0</b> | 0.04 µg/L | 100.0 | 0.01 µg/L | 100.0 |

DL: Detection limit, \* only measured in the 2011-2014 samples.
