# Supplementary material for: Serum levels of environmental pollutants is a risk factor for breast cancer in Inuit: a case control study
Source: PubMed Central journal article supplement (PMC5470290; doi:10.1186/s12940-017-0269-6), 2017-06-13
Supplement: 12940_2017_269_MOESM2_ESM.pdf [file 12940_2017_269_MOESM2_ESM.pdf]

## Additional file 2

### Serum levels of environmental pollutants is a risk factor for breast cancer in Inuit: A case control study

Maria Wielsøe, Peder Kern and Eva C. Bonefeld-Jørgensen

Odds ratio of breast cancer risk associated with lipophilic POPs stratified for recruitment period

| Compounds  | Collection | Unadjusted analysis |                      |              | Adjusted analysis  |                      |              |
|------------|------------|---------------------|----------------------|--------------|--------------------|----------------------|--------------|
|            |            | N (controls/cases)  | OR (95% CI)          | <i>p</i>     | N (controls/cases) | OR (95% CI)          | <i>p</i>     |
| ∑PCB       | 2000-2003  | 31/30               | 1.000 (1.000; 1.000) | 0.422        | 31/30              | 1.000 (1.000; 1.000) | 0.422        |
|            | 2011-2014  | 53/46               | 1.000 (1.000; 1.001) | <b>0.012</b> | 53/46              | 1.000 (1.000; 1.001) | <b>0.012</b> |
| ∑PCB Grp1* | 2000-2003  | 31/30               | 1.003 (0.999; 1.007) | 0.141        | 31/30              | 1.003 (0.999; 1.007) | 0.141        |
|            | 2011-2014  | 53/46               | 1.004 (1.001; 1.008) | <b>0.012</b> | 53/46              | 1.004 (1.001; 1.008) | <b>0.012</b> |
| ∑PCB Grp2* | 2000-2003  | 31/30               | 1.000 (0.999; 1.001) | 0.982        | 31/30              | 1.000 (0.999; 1.001) | 0.982        |
|            | 2011-2014  | 53/46               | 1.001 (1.000; 1.002) | <b>0.009</b> | 53/46              | 1.001 (1.000; 1.002) | <b>0.009</b> |
| ∑PCB Grp3* | 2000-2003  | 31/30               | 1.000 (1.000; 1.001) | 0.234        | 31/30              | 1.000 (1.000; 1.001) | 0.234        |
|            | 2011-2014  | 53/46               | 1.000 (1.000; 1.001) | <b>0.016</b> | 53/46              | 1.000 (1.000; 1.001) | <b>0.016</b> |
| ∑DL-PCB    | 2000-2003  | 31/30               | 1.000 (0.996; 1.004) | 0.992        | 31/30              | 1.000 (0.996; 1.004) | 0.992        |
|            | 2011-2014  | 53/46               | 1.005 (1.001; 1.010) | <b>0.011</b> | 53/46              | 1.005 (1.001; 1.010) | <b>0.011</b> |
| ∑OCP       | 2000-2003  | 31/30               | 1.000 (1.000; 1.001) | 0.077        | 31/30              | 1.000 (1.000; 1.001) | 0.077        |
|            | 2011-2014  | 53/46               | 1.000 (1.000; 1.001) | <b>0.011</b> | 53/46              | 1.000 (1.000; 1.001) | <b>0.011</b> |
| PCB99      | 2000-2003  | 31/30               | 1.003 (0.994; 1.012) | 0.512        | 31/30              | 1.003 (0.994; 1.012) | 0.512        |
|            | 2011-2014  | 53/46               | 1.011 (1.001; 1.020) | <b>0.028</b> | 53/46              | 1.011 (1.001; 1.020) | <b>0.028</b> |
| PCB101     | 2000-2003  | 31/30               | 0.976 (0.917; 1.039) | 0.444        | 31/30              | 0.976 (0.917; 1.039) | 0.444        |
|            | 2011-2014  | 53/46               | 1.046 (0.962; 1.138) | 0.292        | 53/46              | 1.046 (0.962; 1.138) | 0.292        |
| PCB105     | 2000-2003  | 31/30               | 1.000 (0.969; 1.031) | 0.978        | 31/30              | 0.999 (0.964; 1.035) | 0.948        |
|            | 2011-2014  | 53/46               | 1.044 (0.996; 1.091) | <b>0.054</b> | 53/46              | 1.044 (0.996; 1.091) | <b>0.054</b> |
| PCB118     | 2000-2003  | 31/30               | 1.003 (0.997; 1.009) | 0.374        | 31/30              | 1.003 (0.997; 1.009) | 0.374        |
|            | 2011-2014  | 53/46               | 1.008 (1.001; 1.015) | <b>0.025</b> | 53/46              | 1.008 (1.001; 1.015) | <b>0.025</b> |
| PCB138     | 2000-2003  | 31/30               | 1.000 (0.998; 1.002) | 0.858        | 31/30              | 1.000 (0.998; 1.002) | 0.858        |
|            | 2011-2014  | 53/46               | 1.003 (1.001; 1.005) | <b>0.008</b> | 53/46              | 1.003 (1.001; 1.005) | <b>0.008</b> |
| PCB153     | 2000-2003  | 31/30               | 1.001 (1.000; 1.002) | 0.190        | 31/30              | 1.001 (1.000; 1.002) | 0.190        |

|                 |           |       |                      |              |       |                      |              |
|-----------------|-----------|-------|----------------------|--------------|-------|----------------------|--------------|
|                 | 2011-2014 | 53/46 | 1.001 (1.000; 1.002) | <b>0.014</b> | 53/46 | 1.001 (1.000; 1.002) | <b>0.014</b> |
| PCB156          | 2000-2003 | 31/30 | 0.991 (0.980; 1.003) | 0.126        | 31/30 | 0.991 (0.980; 1.003) | 0.126        |
|                 | 2011-2014 | 53/46 | 1.016 (1.004; 1.029) | <b>0.011</b> | 53/46 | 1.016 (1.004; 1.029) | <b>0.011</b> |
| PCB170          | 2000-2003 | 31/30 | 1.001 (0.996; 1.005) | 0.806        | 31/30 | 1.001 (0.996; 1.005) | 0.806        |
|                 | 2011-2014 | 53/46 | 1.004 (1.001; 1.007) | <b>0.021</b> | 53/46 | 1.004 (1.001; 1.007) | <b>0.021</b> |
| PCB180          | 2000-2003 | 31/30 | 1.001 (0.999; 1.002) | 0.290        | 31/30 | 1.001 (0.999; 1.002) | 0.290        |
|                 | 2011-2014 | 53/46 | 1.001 (1.000; 1.002) | <b>0.026</b> | 53/46 | 1.001 (1.000; 1.002) | <b>0.026</b> |
| PCB183          | 2000-2003 | 31/30 | 1.008 (0.989; 1.027) | 0.401        | 31/30 | 1.008 (0.989; 1.027) | 0.401        |
|                 | 2011-2014 | 53/46 | 1.023 (1.005; 1.041) | <b>0.014</b> | 53/46 | 1.023 (1.005; 1.041) | <b>0.014</b> |
| PCB187          | 2000-2003 | 31/30 | 1.002 (0.998; 1.006) | 0.299        | 31/30 | 1.002 (0.998; 1.006) | 0.299        |
|                 | 2011-2014 | 53/46 | 1.004 (1.001; 1.008) | <b>0.012</b> | 53/46 | 1.004 (1.001; 1.008) | <b>0.012</b> |
| cis-Nonachlor   | 2000-2003 | 31/30 | 1.004 (0.995; 1.014) | 0.337        | 31/30 | 1.004 (0.995; 1.014) | 0.337        |
|                 | 2011-2014 | 53/46 | 1.010 (1.002; 1.018) | <b>0.011</b> | 53/46 | 1.010 (1.002; 1.018) | <b>0.011</b> |
| Trans-Nonachlor | 2000-2003 | 31/30 | 1.001 (0.999; 1.003) | 0.186        | 31/30 | 1.001 (0.999; 1.003) | 0.186        |
|                 | 2011-2014 | 53/46 | 1.002 (1.000; 1.003) | <b>0.007</b> | 53/46 | 1.002 (1.000; 1.003) | <b>0.007</b> |
| HCB             | 2000-2003 | 31/30 | 1.000 (0.997; 1.003) | 0.830        | 31/30 | 1.000 (0.997; 1.003) | 0.830        |
|                 | 2011-2014 | 53/46 | 1.004 (1.001; 1.007) | <b>0.017</b> | 53/46 | 1.004 (1.001; 1.007) | <b>0.017</b> |
| Mirex           | 2000-2003 | 31/30 | 1.001 (0.989; 1.014) | 0.823        | 31/30 | 1.001 (0.989; 1.014) | 0.823        |
|                 | 2011-2014 | 53/46 | 1.012 (1.001; 1.023) | <b>0.029</b> | 53/46 | 1.012 (1.001; 1.023) | <b>0.029</b> |
| Oxychlordan     | 2000-2003 | 31/30 | 1.002 (0.999; 1.005) | 0.184        | 31/30 | 1.002 (0.999; 1.005) | 0.184        |
|                 | 2011-2014 | 53/46 | 1.002 (1.000; 1.004) | <b>0.014</b> | 53/46 | 1.002 (1.000; 1.004) | <b>0.014</b> |
| p,p'DDE         | 2000-2003 | 31/30 | 1.001 (1.000; 1.001) | <b>0.036</b> | 31/30 | 1.001 (1.000; 1.001) | <b>0.036</b> |
|                 | 2011-2014 | 53/46 | 1.001 (1.000; 1.001) | <b>0.026</b> | 53/46 | 1.001 (1.000; 1.001) | <b>0.026</b> |
| p,p'DDT         | 2000-2003 | 31/30 | 1.013 (0.992; 1.034) | 0.233        | 31/30 | 1.013 (0.992; 1.034) | 0.233        |
|                 | 2011-2014 | 53/45 | 1.017 (0.992; 1.042) | 0.185        | 53/45 | 1.017 (0.992; 1.042) | 0.185        |
| βHCH            | 2000-2003 | 31/30 | 1.003 (0.981; 1.025) | 0.795        | 31/30 | 1.003 (0.981; 1.025) | 0.795        |
|                 | 2011-2014 | 53/46 | 1.022 (1.001; 1.044) | <b>0.042</b> | 53/46 | 1.022 (1.001; 1.044) | <b>0.042</b> |

n: number of observations per group; OR: odds ratio; 95% CI: 95% confidence interval; Unadjusted analysis: unadjusted estimates were reported; Adjusted: adjusted for confounders identified by change in estimate, following confounders were considered age, BMI, cotinine levels, parity, and breastfeeding; **Bold text**: Significant finding;  $\Sigma$ PCB: PCB 99, 101, 105, 118, 128, 138, 153, 156, 170, 180, 183, 187;  $\Sigma$ PCB group 1 (estrogenic PCBs): PCB 101, 187;  $\Sigma$ PCB group 2 (anti-estrogenic and dioxin-like PCBs): PCB 105, 118, 128, 138, 156, 170;  $\Sigma$ PCB group 3 (CYP1A1 and CYP2B inducing PCBs): PCB 99, 153, 180, 183;  $\Sigma$ DL-PCBs (dioxin-like PCBs): PCB 105, 118, 156;  $\Sigma$ OCP: p,p'-DDT, p,p'-DDE, mirex, β-HCH, HCB, cis- and trans-nonachlor, and oxychlordan.
