# Supplementary material for: Serum levels of environmental pollutants is a risk factor for breast cancer in Inuit: a case control study
Source: PubMed Central journal article supplement (PMC5470290; doi:10.1186/s12940-017-0269-6), 2017-06-13
Supplement: 12940_2017_269_MOESM3_ESM.pdf [file 12940_2017_269_MOESM3_ESM.pdf]

## Additional file 3

### Serum levels of environmental pollutants is a risk factor for breast cancer in Inuit: a case control study

Maria Wielsøe, Peder Kern and Eva C. Bonfeld-Jørgensen

#### Odds ratio of breast cancer associated with PFAA stratified for recruitment period

| Compounds | Collection | Unadjusted analysis |                       |              | Adjusted analysis  |                       |              |
|-----------|------------|---------------------|-----------------------|--------------|--------------------|-----------------------|--------------|
|           |            | N (controls/cases)  | OR (95% CI)           | p            | N (controls/cases) | OR (95% CI)           | p            |
| ΣPFCA     | 2000-2003  | 28/31               | 1.064 (0.975; 1.160)  | 0.162        | 28/31              | 1.067 (0.964; 1.181)  | 0.212        |
|           | 2011-2014  | 53/46               | 1.025 (0.994; 1.058)  | 0.118        | 53/46              | 1.025 (0.994; 1.058)  | 0.118        |
| ΣPFSA     | 2000-2003  | 28/31               | 1.017 (1.002; 1.032)  | <b>0.029</b> | 28/31              | 1.017 (1.002; 1.032)  | <b>0.029</b> |
|           | 2011-2014  | 53/46               | 1.012 (0.998; 1.025)  | 0.085        | 53/46              | 1.012 (0.998; 1.025)  | 0.085        |
| ΣPFAA     | 2000-2003  | 28/19               | 1.014 (1.001; 1.027)  | <b>0.036</b> | 28/19              | 1.014 (1.001; 1.027)  | <b>0.036</b> |
|           | 2011-2014  | 53/46               | 1.008 (0.999; 1.017)  | 0.091        | 53/46              | 1.008 (0.999; 1.017)  | 0.091        |
| PFHpA     | 2000-2003  | -                   | -                     | -            | -                  | -                     | -            |
|           | 2011-2014  | 53/46               | 8.465 (0.902; 79.424) | 0.061        | 40/35              | 1.860 (0.141; 24.577) | 0.638        |
| PFOA      | 2000-2003  | 28/31               | 1.244 (0.914; 1.693)  | 0.164        | 28/13              | 1.547 (0.945; 2.534)  | 0.083        |
|           | 2011-2014  | 53/46               | 1.268 (0.911; 1.764)  | 0.160        | 44/35              | 0.823 (0.462; 1.464)  | 0.507        |
| PFNA      | 2000-2003  | 28/31               | 1.208 (0.856; 1.705)  | 0.283        | 19/16              | 1.434 (0.834; 2.467)  | 0.193        |
|           | 2011-2014  | 53/46               | 1.083 (0.985; 1.190)  | 0.100        | 53/46              | 1.026 (0.927; 1.135)  | 0.620        |
| PFDA      | 2000-2003  | 28/31               | 1.502 (0.858; 2.629)  | 0.155        | 19/16              | 1.743 (0.694; 4.379)  | 0.237        |
|           | 2011-2014  | 53/46               | 1.173 (0.960; 1.434)  | 0.119        | 53/46              | 1.031 (0.816; 1.302)  | 0.799        |
| PFUnA     | 2000-2003  | 28/31               | 1.199 (0.907; 1.584)  | 0.203        | 19/16              | 1.333 (0.814; 2.183)  | 0.253        |
|           | 2011-2014  | 53/46               | 1.056 (0.964; 1.156)  | 0.241        | 53/46              | 0.990 (0.892; 1.099)  | 0.852        |
| PFDoA     | 2000-2003  | 28/31               | 2.771 (0.188; 40.898) | 0.458        | 19/10              | 129.1 (0.38; 44135.8) | 0.102        |
|           | 2011-2014  | 53/46               | 1.189 (0.819; 1.726)  | 0.363        | 45/44              | 1.074 (0.642; 1.796)  | 0.786        |
| PFHxS     | 2000-2003  | 28/31               | 1.269 (1.000; 1.610)  | <b>0.050</b> | 28/31              | 1.269 (1.000; 1.610)  | <b>0.050</b> |
|           | 2011-2014  | 53/46               | 1.102 (0.950; 1.277)  | 0.200        | 53/46              | 1.014 (0.869; 1.184)  | 0.858        |
| PFHpS     | 2000-2003  | -                   | -                     | -            | -                  | -                     | -            |
|           | 2011-2014  | 53/46               | 1.360 (0.856; 2.160)  | 0.193        | -                  | -                     | -            |
| PFOS      | 2000-2003  | 28/31               | 1.018 (1.002; 1.034)  | <b>0.030</b> | 28/31              | 1.018 (1.002; 1.034)  | <b>0.030</b> |
|           | 2011-2014  | 53/46               | 1.013 (0.999; 1.027)  | 0.079        | 53/46              | 1.013 (0.999; 1.027)  | 0.079        |

n: number of observations per group; OR: odds ratio; 95% CI: 95% confidence interval; Unadjusted analysis: unadjusted estimates were reported; Adjusted: adjusted for confounders identified by change in estimate, following confounders were considered age, BMI, cotinine levels, parity, and

breastfeeding; **Bold** text: Significant finding;  $\sum$ PFCA: PFHpA, PFOA, PFNA, PFDA, PFUnA, PFDoA and PFTrA;  $\sum$ PFSA: PFHxS, PFOS and PFOSA;  $\sum$ PFAA:  $\sum$ PFCA +  $\sum$ PFSA.
